# Supplementary material for: Health literacy with a focus on knowledge and use of antibiotics amongst refugees and asylum seekers in Germany – a cross-sectional, single center quantitative study
Source: Research Square preprint supplement (doi:10.21203/rs.3.rs-8305445/v1), 2025-12-22
Supplement: Supplementary file 1 [file 089e940dcd3dfed705591dbe.docx]

## Supplementary material

Table S1: Participants’ responses to the individual HLS-EU-16 items

| How easy do you find it to… | Very Difficult | Difficult | Easy | Very Easy |
| --- | --- | --- | --- | --- |
| …find information on treatments of illnesses that concern you? | 2 (1.9%) | 24 (23.1%) | 67 (64.4%) | 11 (10.6%) |
| …find out where to get professional help when you are ill? | 3 (2.8%) | 23 (21.7%) | 62 (58.5%) | 18 (17%) |
| …understand what a doctor says to you? | 4 (3.8%) | 22 (21%) | 65 (61.9%) | 14 (13.3%) |
| …understand a doctor’s or pharmacist’s instructions on how to take a prescribed medicine? | 2 (1.9%) | 14 (13.3%) | 71 (67.6%) | 18 (17.1%) |
| …judge when you may need to get a second opinion from another doctor? | 6 (5.8%) | 30 (28.8%) | 60 (57.7%) | 8 (7.7%) |
| …use information a doctor gives you to make decisions about your illness? | 2 (1.9%) | 17 (16.2%) | 71 (67.6%) | 15 (14.3%) |
| …follow instructions from a doctor or pharmacist? | 2 (1.9%) | 5 (4.8%) | 82 (78.8%) | 15 (14.4%) |
| …find information on how to manage mental health problems like stress or depression? | 10 (9.8%) | 30 (29.4%) | 48 (47.1%) | 14 (13.7%) |
| …understand health warnings about behavior such as smoking, low physical activity and drinking too much? | 5 (4.8%) | 16 (15.4%) | 64 (61.5%) | 19 (18.3%) |
| …understand why you need health screenings? | 7 (6.7%) | 25 (24%) | 56 (53.8%) | 16 (15.4%) |
| …judge if the information on health risks in the media is reliable? | 8 (7.7%) | 28 (26.9%) | 58 (55.8%) | 10 (9.6%) |
| …decide how you can protect yourself from illness based on information in the media? | 8 (7.7%) | 28 (26.9%) | 54 (51.9%) | 14 (13.5%) |
| …find out about activities that are good for your mental well-being? | 4 (3.8%) | 20 (19.2%) | 66 (63.5%) | 14 (13.5%) |
| …understand advice on health from family members or friends? | 3 (2.9%) | 7 (6.7%) | 75 (72.1%) | 19 (18.3%) |
| …understand information in the media on how to get healthier? | 3 (2.9%) | 19 (18.1%) | 66 (62.9%) | 17 (16.2%) |
| …judge which everyday behavior is related to your health? | 2 (2%) | 22 (22.2%) | 59 (59.6%) | 16 (16.2%) |

Table S2: Participants’ responses to the individual antibiotic knowledge items

| Question | % True | % False | % Don’t Know |
| --- | --- | --- | --- |
| Colds and flu usually get better on their own. | 57.3 | 19.4 | 23.3 |
| Overuse of antibiotics can cause antibiotic resistance. | 55.7 | 10.4 | 34.0 |
| Bacteria which are resistant to antibiotics can spread from person to person. | 46.2 | 18.9 | 34.9 |
| Antibiotic resistance is a problem that could affect me or my family. | 44.3 | 21.7 | 34.0 |
| Anyone could get an antibiotic resistant infection, even people who always take antibiotics correctly. | 43.4 | 19.8 | 36.8 |
| Antibiotics can cause side-effects, such as diarrhea or nausea. | 36.5 | 21.2 | 42.3 |
| Antibiotic resistance means that bacteria become resistant to antibiotics, so the antibiotics no longer work as well against those bacteria. | 35.6 | 15.4 | 49.0 |
| If you have an infection caused by a virus, antibiotics do not help. | 30.5 | 33.3 | 36.2 |
| Today, antibiotic resistance is a big problem in Germany. | 22.9 | 17.1 | 60.0 |
| If you have a sore throat, taking antibiotics usually helps. | 59.0 | 14.3 | 26.7 |
| Antibiotics used to treat pain and inflammation. | 58.4 | 12.9 | 28.7 |
| Antibiotics help you to recover faster when you have a cold | 57.7 | 21.2 | 21.2 |
| Antibiotics can be used to treat infections caused by bacteria. | 51.4 | 17.1 | 31.4 |
| Having a fever is a sign that you should take antibiotics | 50.5 | 22.9 | 26.7 |
| In my opinion it is always better to take antibiotics when you are sick to avoid complications. | 43.4 | 26.4 | 30.2 |
| Antibiotic resistance means that your body becomes resistant to antibiotics, so that the antibiotics no longer work as well for you. | 41.7 | 14.6 | 43.7 |
| Headaches and body aches can be treated with antibiotics. | 39.2 | 29.4 | 31.4 |
| Antibiotic resistance is only a problem for people who use antibiotics regularly. | 31.1 | 16.0 | 52.8 |
| An ear infection in a child almost always needs to be treated with antibiotics. | 30.3 | 22.2 | 47.5 |
| Diarrhea can be treated with antibiotics. | 26.9 | 31.7 | 41.3 |
